# Supplementary material for: An Ecological Assessment of the Pandemic Threat of Zika Virus
Source: PLOS journal article supplement (doi:10.1371/journal.pntd.0004968), 2016-08-26
Supplement: S4 (10.1371/journal.pntd.0004968.s004) [file journal.pntd.0004968.s004]

**Table S5.** *Aedes africanus* full variable set preliminary model variable importance

|              | GLM   | GBM   | GAM   | CTA   | ANN   | SRE   | FDA   | MARS  | RF    | MAXENT |
|--------------|-------|-------|-------|-------|-------|-------|-------|-------|-------|--------|
| <b>bio1</b>  | 0.437 | 0.003 | 0.56  | 0.245 | 0.141 | 0.305 | 0.231 | 0.085 | 0.005 | 0      |
| <b>bio2</b>  | 0     | 0.006 | 0.54  | 0.217 | 0.051 | 0.055 | 0     | 0     | 0.005 | 0.251  |
| <b>bio3</b>  | 0     | 0.009 | 0.628 | 0     | 0.049 | 0.465 | 0     | 0     | 0.029 | 0.489  |
| <b>bio4</b>  | 0.032 | 0.372 | 0.751 | 0.845 | 0.726 | 0.486 | 0     | 0.56  | 0.04  | 0.42   |
| <b>bio5</b>  | 0     | 0     | 0.564 | 0     | 0.089 | 0.235 | 0     | 0     | 0.002 | 0.065  |
| <b>bio6</b>  | 0     | 0.003 | 0.477 | 0     | 0.137 | 0.317 | 0.09  | 0.368 | 0.015 | 0.132  |
| <b>bio7</b>  | 0     | 0.012 | 0.73  | 0.108 | 0.165 | 0.367 | 0     | 0.406 | 0.012 | 0.253  |
| <b>bio8</b>  | 0     | 0.008 | 0.603 | 0     | 0.186 | 0.336 | 0.126 | 0.402 | 0.01  | 0      |
| <b>bio9</b>  | 0.625 | 0.003 | 0.617 | 0     | 0.108 | 0.311 | 0     | 0.388 | 0.006 | 0      |
| <b>bio10</b> | 0.447 | 0.001 | 0.709 | 0     | 0.133 | 0.252 | 0     | 0.419 | 0.003 | 0.183  |
| <b>bio11</b> | 0     | 0.025 | 0.605 | 0.094 | 0.365 | 0.457 | 0.953 | 0.629 | 0.019 | 0.248  |
| <b>bio12</b> | 0.11  | 0.007 | 0.484 | 0.03  | 0.185 | 0.386 | 0.02  | 0.266 | 0.007 | 0.043  |
| <b>bio13</b> | 0.231 | 0.002 | 0.381 | 0     | 0.344 | 0.399 | 1     | 0.43  | 0.007 | 0.118  |
| <b>bio14</b> | 0.177 | 0.001 | 0.3   | 0     | 0.112 | 0.035 | 0.033 | 0     | 0.004 | 0.35   |
| <b>bio15</b> | 0.243 | 0.001 | 0.349 | 0     | 0.035 | 0.148 | 0     | 0     | 0.003 | 0.128  |
| <b>bio16</b> | 0     | 0.004 | 0.478 | 0     | 0.513 | 0.323 | 0.532 | 0.431 | 0.008 | 0.267  |
| <b>bio17</b> | 0     | 0.002 | 0.074 | 0     | 0.103 | 0.04  | 0     | 0     | 0.005 | 0.117  |
| <b>bio18</b> | 0.28  | 0.011 | 0.307 | 0.186 | 0.186 | 0.23  | 0.085 | 0.099 | 0.007 | 0.397  |
| <b>bio19</b> | 0.293 | 0.124 | 0.446 | 0.485 | 0.861 | 0.035 | 0.673 | 0.248 | 0.052 | 0.44   |
| <b>NDVI</b>  | 0.286 | 0.04  | 0.468 | 0.218 | 0.066 | 0.175 | 0.088 | 0.073 | 0.02  | 0.201  |

**Table S6.** *Aedes albopictus* full variable set preliminary model variable importance

|              | GLM   | GBM   | GAM   | CTA   | ANN   | SRE   | FDA   | MARS  | RF    | MAXENT |
|--------------|-------|-------|-------|-------|-------|-------|-------|-------|-------|--------|
| <b>bio1</b>  | 0.289 | 0     | 0.216 | 0.011 | 0.09  | 0.248 | 0.173 | 0.006 | 0.01  | 0.017  |
| <b>bio2</b>  | 0.06  | 0.017 | 0.048 | 0.031 | 0.031 | 0.249 | 0.025 | 0.018 | 0.082 | 0.012  |
| <b>bio3</b>  | 0.279 | 0.003 | 0.277 | 0.13  | 0     | 0.193 | 0.185 | 0.261 | 0.016 | 0.018  |
| <b>bio4</b>  | 0.528 | 0     | 0.352 | 0.016 | 0.197 | 0.242 | 0     | 0     | 0.015 | 0.008  |
| <b>bio5</b>  | 0.131 | 0     | 0.875 | 0.015 | 0.007 | 0.305 | 0.363 | 0.202 | 0.012 | 0.014  |
| <b>bio6</b>  | 0.262 | 0     | 1     | 0     | 0.334 | 0.237 | 0.626 | 0.136 | 0.017 | 0.019  |
| <b>bio7</b>  | 0.742 | 0.004 | 0.607 | 0.104 | 0.511 | 0.256 | 0.071 | 0.417 | 0.05  | 0.009  |
| <b>bio8</b>  | 0.001 | 0.001 | 0.047 | 0     | 0.03  | 0.275 | 0     | 0     | 0.008 | 0.038  |
| <b>bio9</b>  | 0.007 | 0     | 0.1   | 0     | 0.049 | 0.249 | 0     | 0     | 0.008 | 0.038  |
| <b>bio10</b> | 0.835 | 0.01  | 0.581 | 0     | 0.004 | 0.281 | 0.619 | 0.338 | 0.007 | 0.017  |
| <b>bio11</b> | 0.164 | 0     | 0.292 | 0     | 0.012 | 0.236 | 0.624 | 0.129 | 0.011 | 0.023  |
| <b>bio12</b> | 0.041 | 0.001 | 0.009 | 0.057 | 0.482 | 0.299 | 0     | 0     | 0.011 | 0.015  |
| <b>bio13</b> | 0.207 | 0.001 | 0.274 | 0     | 0.295 | 0.276 | 0     | 0     | 0.01  | 0      |
| <b>bio14</b> | 0.029 | 0.001 | 0.04  | 0.003 | 0.016 | 0.229 | 0.04  | 0.069 | 0.012 | 0.01   |
| <b>bio15</b> | 0.007 | 0     | 0.02  | 0.002 | 0.004 | 0.138 | 0     | 0     | 0.015 | 0.203  |
| <b>bio16</b> | 0     | 0     | 0.051 | 0.006 | 0.013 | 0.278 | 0     | 0     | 0.015 | 0.002  |
| <b>bio17</b> | 0.019 | 0.002 | 0.027 | 0     | 0.037 | 0.243 | 0.046 | 0.039 | 0.006 | 0.022  |
| <b>bio18</b> | 0.147 | 0.474 | 0.075 | 0.377 | 0.315 | 0.287 | 0.44  | 0.122 | 0.114 | 0.066  |
| <b>bio19</b> | 0.003 | 0.005 | 0.011 | 0     | 0.012 | 0.213 | 0.013 | 0.008 | 0.013 | 0.019  |
| <b>NDVI</b>  | 0.027 | 0.009 | 0.021 | 0.024 | 0.008 | 0.26  | 0.026 | 0.032 | 0.008 | 0.006  |

**Table S7.** AUC of ten models for five species (with reduced variable sets). Bolded models were shown in the final models. Updated Zika model incorporating New World outbreak data included as “ZIKV+”.

|        | GLM          | GBM          | GAM          | CTA          | ANN          | SRE   | FDA          | MARS         | RF           | MAXENT       |
|--------|--------------|--------------|--------------|--------------|--------------|-------|--------------|--------------|--------------|--------------|
| A.Aeg  | <b>0.975</b> | <b>0.980</b> | <b>0.981</b> | <b>0.977</b> | <b>0.957</b> | 0.855 | <b>0.974</b> | <b>0.976</b> | <b>1.000</b> | 0.930        |
| A.Afr  | <b>0.983</b> | <b>0.999</b> | <b>1.000</b> | <b>0.985</b> | <b>0.967</b> | 0.837 | <b>0.959</b> | <b>0.979</b> | <b>1.000</b> | 0.739        |
| A.Alb* | <b>0.919</b> | <b>0.942</b> | <b>0.938</b> | <b>0.945</b> | 0.882        | 0.760 | <b>0.923</b> | <b>0.930</b> | <b>1.000</b> | <b>0.940</b> |
| ZIKV   | <b>0.934</b> | <b>0.975</b> | <b>0.968</b> | <b>0.920</b> | 0.773        | 0.741 | <b>0.934</b> | <b>0.938</b> | <b>1.000</b> | 0.807        |
| ZIKV+  | <b>0.920</b> | <b>0.975</b> | <b>0.946</b> | <b>0.921</b> | --           | --    | <b>0.927</b> | <b>0.936</b> | <b>1.000</b> | --           |
| DENG*  | <b>0.919</b> | <b>0.942</b> | <b>0.938</b> | <b>0.945</b> | 0.882        | 0.760 | <b>0.923</b> | <b>0.930</b> | <b>1.000</b> | <b>0.940</b> |

**Table S8.** Zika final model variable importances

|              | <b>GLM</b> | <b>GBM</b> | <b>GAM</b> | <b>CTA</b> | <b>FDA</b> | <b>MARS</b> | <b>RF</b> |
|--------------|------------|------------|------------|------------|------------|-------------|-----------|
| <b>bio1</b>  | 0.608      | 0.014      | 0.654      | 0          | 0          | 0           | 0.026     |
| <b>bio2</b>  | 0.919      | 0.006      | 0.738      | 0.068      | 0          | 0           | 0.019     |
| <b>bio3</b>  | 0.774      | 0.02       | 0.481      | 0.178      | 0.1        | 0           | 0.029     |
| <b>bio4</b>  | 1          | 0          | 0.329      | 0          | 0          | 0           | 0.017     |
| <b>bio5</b>  | 0          | 0.006      | 0.708      | 0          | 0          | 0.279       | 0.015     |
| <b>bio6</b>  | 0.626      | 0.211      | 0          | 0.879      | 0.46       | 0.803       | 0.125     |
| <b>bio7</b>  | 0          | 0.033      | 0.563      | 0          | 0.268      | 0.354       | 0.051     |
| <b>bio10</b> | 1          | 0.003      | 0.792      | 0          | 0          | 0           | 0.014     |
| <b>bio11</b> | 0          | 0.018      | 1          | 0          | 0          | 0.033       | 0.047     |
| <b>bio12</b> | 0          | 0.022      | 0.104      | 0          | 0.227      | 0           | 0.028     |
| <b>bio13</b> | 0          | 0.109      | 0.075      | 0          | 0.462      | 0.873       | 0.116     |
| <b>bio15</b> | 0          | 0.046      | 0.207      | 0.323      | 0.071      | 0.295       | 0.026     |
| <b>bio16</b> | 0          | 0.01       | 0          | 0          | 0.153      | 0.506       | 0.043     |
| <b>bio17</b> | 0.258      | 0.008      | 0.183      | 0.094      | 0.208      | 0.211       | 0.013     |
| <b>bio19</b> | 0          | 0.01       | 0.02       | 0.201      | 0.062      | 0.326       | 0.008     |
| <b>NDVI</b>  | 0          | 0.082      | 0.266      | 0          | 0.095      | 0.027       | 0.06      |

**Table S9.** Dengue final model variable importances

|              | <b>GLM</b> | <b>GBM</b> | <b>GAM</b> | <b>CTA</b> | <b>FDA</b> | <b>MARS</b> | <b>RF</b> | <b>MAXENT</b> |
|--------------|------------|------------|------------|------------|------------|-------------|-----------|---------------|
| <b>bio1</b>  | 0.388      | 0.001      | 0.363      | 0.004      | 0.248      | 0           | 0.017     | 0             |
| <b>bio2</b>  | 0.004      | 0.029      | 0.054      | 0.097      | 0          | 0           | 0.053     | 0.021         |
| <b>bio4</b>  | 0.159      | 0.012      | 0.241      | 0.076      | 0          | 0.233       | 0.06      | 0.031         |
| <b>bio6</b>  | 0.236      | 0.008      | 0.213      | 0          | 0.266      | 0           | 0.045     | 0.017         |
| <b>bio7</b>  | 0.702      | 0.036      | 0.571      | 0.328      | 0.639      | 0.406       | 0.073     | 0.043         |
| <b>bio8</b>  | 0.225      | 0.009      | 0.083      | 0.055      | 0.006      | 0.235       | 0.021     | 0.084         |
| <b>bio9</b>  | 0.272      | 0          | 0.063      | 0.008      | 0          | 0.186       | 0.012     | 0.029         |
| <b>bio10</b> | 0.427      | 0          | 0.502      | 0.033      | 0.508      | 0.051       | 0.015     | 0.071         |
| <b>bio11</b> | 1          | 0.109      | 0.818      | 0.527      | 0.85       | 0.158       | 0.062     | 0.487         |
| <b>bio13</b> | 0.012      | 0.008      | 0.138      | 0.098      | 0.072      | 0.104       | 0.02      | 0.001         |
| <b>bio14</b> | 0.032      | 0.009      | 0.082      | 0.147      | 0.022      | 0.028       | 0.034     | 0.03          |
| <b>bio15</b> | 0          | 0.001      | 0.031      | 0.028      | 0          | 0           | 0.011     | 0.03          |
| <b>bio16</b> | 0          | 0          | 0.075      | 0.005      | 0          | 0           | 0.016     | 0.007         |
| <b>bio18</b> | 0.005      | 0.002      | 0.004      | 0.011      | 0          | 0           | 0.025     | 0.001         |
| <b>bio19</b> | 0.032      | 0.026      | 0.055      | 0.064      | 0.069      | 0.052       | 0.048     | 0.074         |
| <b>NDVI</b>  | 0.095      | 0.042      | 0.085      | 0.17       | 0.081      | 0.113       | 0.05      | 0.052         |

**Table S10.** *Aedes aegypti* final model variable importances

|              | GLM   | GBM   | GAM   | CTA   | ANN   | FDA   | MARS  | RF    |
|--------------|-------|-------|-------|-------|-------|-------|-------|-------|
| <b>bio1</b>  | 0.276 | 0.01  | 0.462 | 0.012 | 0.019 | 0.212 | 0.024 | 0.02  |
| <b>bio2</b>  | 0.13  | 0.011 | 0.05  | 0.234 | 0.023 | 0     | 0     | 0.083 |
| <b>bio3</b>  | 0.372 | 0.005 | 0.148 | 0.048 | 0.008 | 0.102 | 0.078 | 0.018 |
| <b>bio4</b>  | 0.82  | 0.001 | 0.198 | 0.026 | 0.048 | 0     | 0     | 0.02  |
| <b>bio5</b>  | 0.273 | 0     | 0.178 | 0.012 | 0.064 | 0.215 | 0     | 0.016 |
| <b>bio7</b>  | 0.755 | 0.019 | 0.328 | 0.056 | 0.057 | 0.071 | 0.23  | 0.048 |
| <b>bio9</b>  | 0.068 | 0     | 0.016 | 0.039 | 0.051 | 0     | 0.008 | 0.01  |
| <b>bio10</b> | 0.94  | 0.018 | 0.611 | 0.061 | 0.017 | 0.716 | 0.306 | 0.029 |
| <b>bio11</b> | 0.472 | 0.001 | 0.621 | 0.092 | 0.169 | 0.752 | 0.015 | 0.022 |
| <b>bio13</b> | 0.345 | 0.012 | 0.06  | 0.076 | 0.077 | 0.753 | 0.108 | 0.031 |
| <b>bio14</b> | 0.013 | 0.004 | 0.023 | 0.007 | 0.02  | 0.019 | 0.008 | 0.018 |
| <b>bio15</b> | 0.005 | 0     | 0.014 | 0.003 | 0.032 | 0     | 0     | 0.013 |
| <b>bio16</b> | 0.081 | 0     | 0.033 | 0.009 | 0.088 | 0.11  | 0.051 | 0.024 |
| <b>bio18</b> | 0.086 | 0.14  | 0.085 | 0.159 | 0.661 | 0.039 | 0.352 | 0.065 |
| <b>bio19</b> | 0.009 | 0.004 | 0.011 | 0.043 | 0.026 | 0.025 | 0.015 | 0.018 |
| <b>NDVI</b>  | 0.051 | 0.02  | 0.031 | 0.034 | 0.029 | 0.052 | 0.042 | 0.021 |

**Table S11.** *Aedes africanus* final model variable importances

|              | GLM   | GBM   | GAM   | CTA   | ANN   | FDA   | MARS  | RF    |
|--------------|-------|-------|-------|-------|-------|-------|-------|-------|
| <b>bio1</b>  | 0.562 | 0     | 0.696 | 0     | 0.112 | 0.518 | 0.062 | 0.004 |
| <b>bio2</b>  | 0.184 | 0.005 | 0.1   | 0.078 | 0.165 | 0     | 0     | 0.007 |
| <b>bio3</b>  | 0.418 | 0.005 | 0.511 | 0.138 | 0.01  | 0.041 | 0     | 0.027 |
| <b>bio4</b>  | 0.999 | 0.423 | 0.324 | 0.717 | 0.884 | 0.269 | 0.548 | 0.041 |
| <b>bio7</b>  | 0.41  | 0.005 | 0.311 | 0.101 | 0.349 | 0     | 0.018 | 0.017 |
| <b>bio8</b>  | 0     | 0.013 | 0.564 | 0.229 | 0.451 | 0.014 | 0.361 | 0.012 |
| <b>bio9</b>  | 0.545 | 0.002 | 0.582 | 0     | 0.392 | 0     | 0.396 | 0.007 |
| <b>bio10</b> | 0.69  | 0.003 | 0.584 | 0.141 | 0.132 | 0     | 0.219 | 0.009 |
| <b>bio11</b> | 0     | 0.01  | 0.571 | 0.276 | 0.355 | 0.972 | 0     | 0.01  |
| <b>bio13</b> | 0.688 | 0.025 | 0.747 | 0.18  | 0.912 | 0.871 | 0.445 | 0.024 |
| <b>bio14</b> | 0.301 | 0.002 | 0.265 | 0.013 | 0.216 | 0.071 | 0     | 0.004 |
| <b>bio15</b> | 0.391 | 0.001 | 0.396 | 0.038 | 0.293 | 0     | 0     | 0.005 |
| <b>bio16</b> | 0.136 | 0.006 | 0.398 | 0.033 | 0.433 | 0.356 | 0.189 | 0.017 |
| <b>bio18</b> | 0.162 | 0.01  | 0.331 | 0.021 | 0.226 | 0.069 | 0.069 | 0.009 |
| <b>bio19</b> | 0.11  | 0.127 | 0.517 | 0.246 | 0.541 | 0.733 | 0.421 | 0.047 |
| <b>NDVI</b>  | 0.239 | 0.065 | 0.297 | 0     | 0.291 | 0.176 | 0.21  | 0.028 |

**Table S12.** *Aedes albopictus* final model variable importances

|              | <b>GLM</b> | <b>GBM</b> | <b>GAM</b> | <b>CTA</b> | <b>FDA</b> | <b>MARS</b> | <b>RF</b> | <b>MAXENT</b> |
|--------------|------------|------------|------------|------------|------------|-------------|-----------|---------------|
| <b>bio1</b>  | 0.35       | 0          | 0.357      | 0          | 0.196      | 0.198       | 0.01      | 0.143         |
| <b>bio2</b>  | 0.058      | 0.032      | 0.001      | 0.233      | 0.003      | 0.018       | 0.105     | 0.094         |
| <b>bio3</b>  | 0.297      | 0.003      | 0.069      | 0.055      | 0.103      | 0.189       | 0.027     | 0.066         |
| <b>bio4</b>  | 0.416      | 0          | 0.312      | 0          | 0.025      | 0.141       | 0.023     | 0.005         |
| <b>bio5</b>  | 0.569      | 0          | 0.41       | 0          | 0.286      | 0.311       | 0.026     | 0.019         |
| <b>bio6</b>  | 1          | 0          | 0.45       | 0          | 0.041      | 0.355       | 0.023     | 0.001         |
| <b>bio7</b>  | 0.29       | 0.006      | 0.181      | 0          | 0          | 0           | 0.083     | 0.003         |
| <b>bio10</b> | 0.761      | 0.011      | 0.61       | 0.01       | 0.646      | 0.36        | 0.012     | 0.122         |
| <b>bio11</b> | 0.5        | 0          | 0.243      | 0.007      | 0.313      | 0.281       | 0.013     | 0             |
| <b>bio12</b> | 0.046      | 0.002      | 0.017      | 0          | 0          | 0           | 0.014     | 0.007         |
| <b>bio13</b> | 0.226      | 0.001      | 0.055      | 0          | 0          | 0           | 0.022     | 0.16          |
| <b>bio14</b> | 0.017      | 0.002      | 0.012      | 0          | 0.008      | 0.023       | 0.021     | 0.028         |
| <b>bio15</b> | 0.003      | 0.001      | 0.001      | 0.009      | 0          | 0.009       | 0.016     | 0.004         |
| <b>bio18</b> | 0.105      | 0.462      | 0.07       | 0.643      | 0.357      | 0.113       | 0.154     | 0.057         |
| <b>bio19</b> | 0.002      | 0.005      | 0.009      | 0          | 0.009      | 0           | 0.021     | 0.021         |
| <b>NDVI</b>  | 0.026      | 0.007      | 0.079      | 0.002      | 0.022      | 0.015       | 0.009     | 0.058         |



**Table S13.** Variable importance in supplementary ZIKV+ model.

|              | <b>GLM</b> | <b>GBM</b> | <b>GAM</b> | <b>CTA</b> | <b>FDA</b> | <b>MARS</b> | <b>RF</b> |
|--------------|------------|------------|------------|------------|------------|-------------|-----------|
| <b>bio1</b>  | 0.34       | 0.001      | 0.431      | 0          | 0.125      | 0.046       | 0.008     |
| <b>bio2</b>  | 0          | 0.006      | 0.098      | 0.143      | 0          | 0           | 0.015     |
| <b>bio3</b>  | 0.223      | 0.003      | 0.027      | 0.231      | 0.307      | 0.039       | 0.024     |
| <b>bio4</b>  | 0.456      | 0.094      | 0.819      | 0          | 0.16       | 0.684       | 0.07      |
| <b>bio6</b>  | 0          | 0.004      | 0.344      | 0          | 0          | 0           | 0.011     |
| <b>bio7</b>  | 0.276      | 0.025      | 0          | 0          | 0.104      | 0           | 0.034     |
| <b>bio8</b>  | 0.822      | 0.123      | 0.231      | 0.604      | 0.91       | 0.501       | 0.058     |
| <b>bio10</b> | 0.636      | 0.007      | 0.549      | 0.198      | 0          | 0.59        | 0.007     |
| <b>bio11</b> | 0          | 0.003      | 0.994      | 0          | 0.036      | 0.406       | 0.017     |
| <b>bio13</b> | 0          | 0.009      | 0.04       | 0.272      | 0.082      | 0           | 0.018     |
| <b>bio15</b> | 0          | 0.011      | 0.167      | 0.017      | 0.124      | 0.328       | 0.017     |
| <b>bio16</b> | 0          | 0.011      | 0.048      | 0.061      | 0.013      | 0.033       | 0.012     |
| <b>bio17</b> | 0          | 0.003      | 0.107      | 0          | 0          | 0.133       | 0.012     |
| <b>bio18</b> | 0.071      | 0.008      | 0.1        | 0.034      | 0.023      | 0.163       | 0.016     |
| <b>bio19</b> | 0          | 0.032      | 0.14       | 0.173      | 0.129      | 0.111       | 0.026     |
| <b>NDVI</b>  | 0.184      | 0.058      | 0.061      | 0.082      | 0.109      | 0.156       | 0.04      |
